Covi, J. A., Treleaven, W. D. and Hand, S. C. (2005). V-ATPase inhibition prevents recovery from anoxia in *Artemia franciscana* embryos: quiescence signaling through dissipation of proton gradients. *J. Exp. Biol.* **208**, 2799-2808.

In the final print version and the pdf version available on-line, an incomplete version of Fig. 6 was published, with the lower *x* axis and labels obscured by the figure legend. The full-text version on-line is correct. The complete figure is reproduced below.

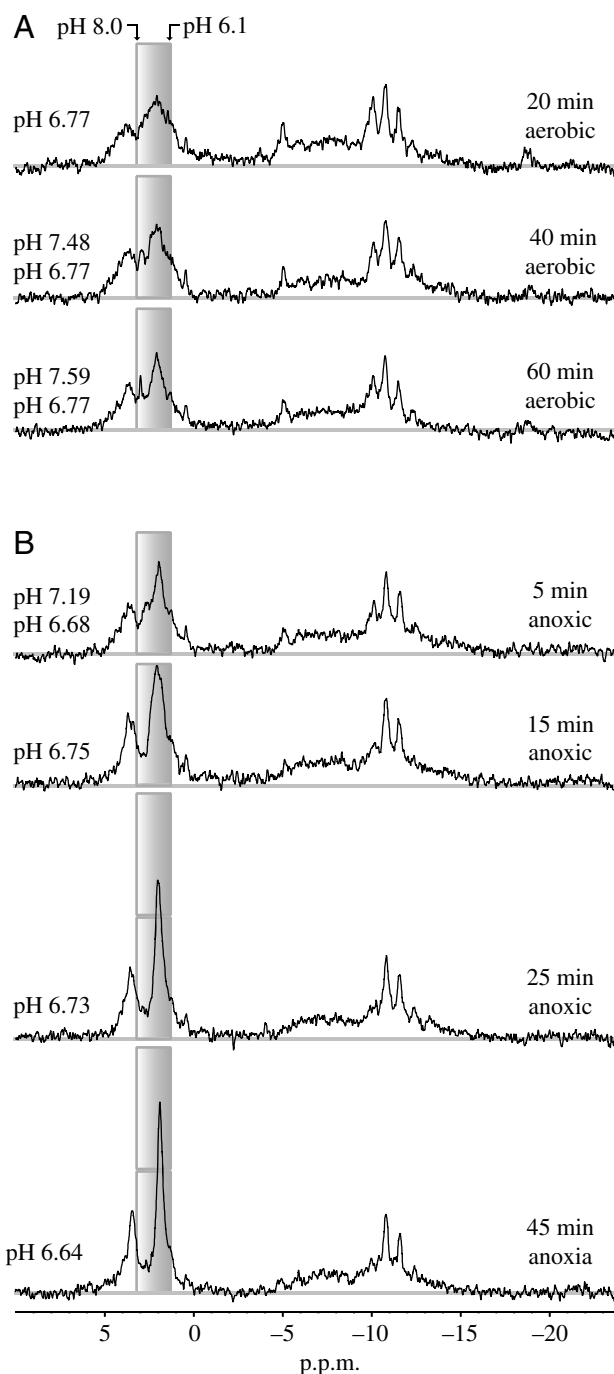

We apologise for any inconvenience this may have caused readers.
